# Supplementary material for: β-glucan protects against necrotizing enterocolitis in mice by inhibiting intestinal inflammation, improving the gut barrier, and modulating gut microbiota
Source: Springer Nature journal article supplement (doi:10.1186/s12967-022-03866-x), 2023-01-10

Fig. S2 Circos plot presented the proportion of *Bacteroides* in the three groups.

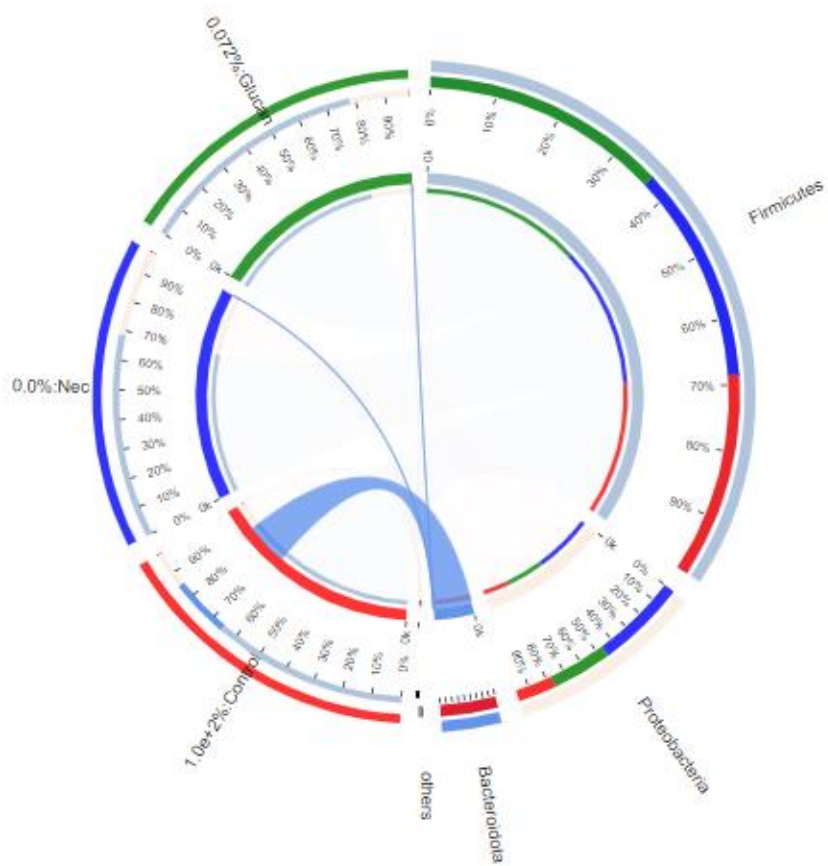

Supplement: MOESM2 [file 12967_2022_3866_MOESM2_ESM.pdf]
